# Supplementary material
Source: PubMed Central journal article supplement (PMC8259679)
Supplement: ASN.2020081142SupplementaryData1.pdf [file ASN.2020081142SupplementaryData1.pdf]

## **Supplemental Material**

### **Blijdorp and Tutakhel *et al.*, Comparing Approaches to Normalize, Quantify, and Characterize Urinary Extracellular Vesicles**

#### **Supplemental Table of Contents**

**Table S1:** Characteristics of healthy subjects

**Table S2:** Characteristics of patients

**Table S3:** Antibodies

**Table S4:** Differential ultracentrifugation steps

**Table S5:** Overview of statistical analyses

**Table S6:** Additional characteristics and urine biochemistries of the water loading experiment

**Figure S1:** Schematic overview of water loading test

**Figure S2:** Particle yield of differential ultracentrifugation

**Figure S3:** Effect of centrifugation on particle size

**Figure S4:** Correlation CD9+ particles with urine creatinine

**Figure S5:** Urine characteristics and particle concentrations after water loading or time-control

**Figure S6:** Particle size distribution per time point in the water loading study

**Figure S7:** Representative raw image data of NTA, EVQuant, and CD9-TR-FIA

**Figure S8:** Additional immunoblots of CD9 and CD63 precipitations

**Figure S9:** Co-localization studies for a second CD9 and CD63 antibody, and for CD81.

**Figure S10:** Additional NTA data

**Figure S11:** Characteristics of the extracellular-epitope AQP2 antibody

**Videos S1 and S2:** Representative NTA videos before and after the addition of THP

**Table S1.** Characteristics of healthy subjects

|                                                                                  | Age (years) | Sex (F/M) | Weight (kg) | BMI (kg/m <sup>2</sup> ) | Creatinine excretion* (mmol/day) |
|----------------------------------------------------------------------------------|-------------|-----------|-------------|--------------------------|----------------------------------|
| <b>Healthy subjects subjected to water deprivation followed by water loading</b> |             |           |             |                          |                                  |
| Subject 1 <sup>#</sup>                                                           | 46          | M         | 80.8        | 25.8                     | N.A.                             |
| Subject 2 <sup>#</sup>                                                           | 27          | M         | 92.6        | 27.7                     | N.A.                             |
| Subject 3 <sup>#</sup>                                                           | 40          | M         | 91.8        | 27.4                     | N.A.                             |
| Subject 4                                                                        | 27          | M         | 96.6        | 25.7                     | 21.3                             |
| Subject 5                                                                        | 27          | M         | 103.5       | 27.2                     | 18.5                             |
| Subject 6                                                                        | 30          | M         | 85.7        | 25.6                     | 17.8                             |
| Subject 7                                                                        | 28          | M         | 93.0        | 26.9                     | 18.7                             |
| Subject 8                                                                        | 27          | M         | 65.3        | 21.1                     | 17.6                             |
| Subject 9                                                                        | 43          | M         | 90.4        | 25.0                     | 17.8                             |
| Subject 10                                                                       | 34          | M         | 75.1        | 22.4                     | 14.1                             |
| Subject 11                                                                       | 30          | M         | 70.9        | 22.4                     | 16.1                             |
| <b>Average</b>                                                                   | 33±7        | M         | 86±12       | 25±2                     | 18±2                             |
| <b>Healthy subjects who provided random spot urine</b>                           |             |           |             |                          |                                  |
| Subject 12                                                                       | 26          | M         | 70          | 23.7                     | N.A.                             |
| Subject 13                                                                       | 29          | M         | 89          | 26.6                     | N.A.                             |
| Subject 14                                                                       | 42          | M         | 74          | 22.6                     | N.A.                             |
| Subject 15                                                                       | 28          | M         | 76          | 23.5                     | N.A.                             |
| Subject 16                                                                       | 25          | M         | 75          | 22.6                     | N.A.                             |
| Subject 17                                                                       | 31          | M         | 63          | 19.7                     | N.A.                             |
| Subject 18                                                                       | 55          | M         | 90          | 24.9                     | N.A.                             |
| Subject 19                                                                       | 29          | M         | 70          | 24.2                     | N.A.                             |
| Subject 20                                                                       | 26          | F         | 65          | 23.0                     | N.A.                             |
| Subject 21                                                                       | 27          | F         | 69          | 23.9                     | N.A.                             |
| Subject 22                                                                       | 35          | F         | 55          | 22.9                     | N.A.                             |
| Subject 23                                                                       | 30          | F         | 75          | 25.6                     | N.A.                             |
| Subject 24                                                                       | 41          | F         | 58          | 21.3                     | N.A.                             |
| Subject 25                                                                       | 26          | F         | 74          | 23.1                     | N.A.                             |
| Subject 26                                                                       | 53          | F         | 85          | 29.8                     | N.A.                             |
| <b>Average</b>                                                                   | 34±10       | F: 47%    | 73±10       | 24±2                     | N.A.                             |

N.A., not available

\* Extrapolated from excretion in 12 hours

<sup>#</sup> These subjects participated both in the water loading study and as time-controls on a separate day.

**Table S2.** Characteristics of patients

|                | Age<br>(years) | Sex<br>(F/M) | Weight<br>(kg) | BMI<br>(kg/m <sup>2</sup> ) | Creatinine<br>Excretion*<br>(mmol/day) | eGFR<br>(ml/min<br>/1.73m <sup>2</sup> ) | ACR<br>(spot urine)<br>(mg/mol) |
|----------------|----------------|--------------|----------------|-----------------------------|----------------------------------------|------------------------------------------|---------------------------------|
| Patient 1      | 41             | F            | 54.8           | 19.2                        | 11.5                                   | 64                                       | 7.2                             |
| Patient 2      | 22             | M            | 82.8           | 24.5                        | N.A.                                   | 103                                      | 0.6                             |
| Patient 3      | 58             | F            | 77.0           | 25.4                        | 12.5                                   | 20                                       | 0.9                             |
| Patient 4      | 58             | M            | 90.0           | 29.7                        | 11.6                                   | 18                                       | 176.3                           |
| Patient 5      | 49             | F            | 72.0           | 25.5                        | 11.0                                   | 86                                       | 5.8                             |
| Patient 6      | 55             | F            | 94.0           | 32.5                        | 9.4                                    | 37                                       | 0.5                             |
| Patient 7      | 43             | M            | 86.5           | 23.0                        | 17.4                                   | 73                                       | 9.7                             |
| Patient 8      | 23             | F            | 74.0           | 25.6                        | 11.7                                   | 107                                      | 6.6                             |
| Patient 9      | 54             | F            | 90.0           | 31.5                        | 10.6                                   | 20                                       | 7.6                             |
| Patient 10     | 39             | M            | 107.0          | 30.3                        | 15.6                                   | 103                                      | 4.5                             |
| Patient 11     | 54             | M            | 98.3           | 26.7                        | 14.6                                   | 82                                       | 0.0                             |
| Patient 12     | 43             | F            | 67.1           | 24.6                        | 12.2                                   | 75                                       | 1.5                             |
| Patient 13     | 53             | M            | 91.5           | 26.4                        | 20.0                                   | 60                                       | 2.0                             |
| Patient 14     | 36             | F            | 65.0           | 22.0                        | 13.3                                   | 107                                      | 7.1                             |
| Patient 15     | 58             | M            | 105.0          | 27.3                        | 26.9                                   | 66                                       | 0.6                             |
| Patient 16     | 64             | M            | 78.0           | 24.6                        | 19.7                                   | 34                                       | 2.0                             |
| Patient 17     | 57             | F            | 68.0           | 25.6                        | 8.1                                    | 66                                       | 0.6                             |
| Patient 18     | 54             | F            | 78.6           | 26.0                        | 11.3                                   | 62                                       | 0.8                             |
| Patient 19     | 34             | F            | 79.6           | 30.7                        | 13.0                                   | 87                                       | 1.9                             |
| Patient 20     | 24             | F            | 86.7           | 28.0                        | 11.3                                   | 120                                      | 0.4                             |
| Patient 21     | 43             | F            | 60.9           | 23.8                        | 9.8                                    | 101                                      | 0.7                             |
| Patient 22     | 36             | F            | 71.2           | 26.8                        | 10.3                                   | 86                                       | 3.3                             |
| Patient 23     | 54             | M            | 74.0           | 24.2                        | 12.6                                   | 58                                       | 13.9                            |
| Patient 24     | 51             | M            | 90.7           | 24.6                        | 19.9                                   | 73                                       | 14.2                            |
| Patient 25     | 45             | F            | 64.0           | 21.6                        | 9.2                                    | 90                                       | 1.1                             |
| Patient 26     | 60             | M            | 90.0           | 26.6                        | 15.8                                   | 16                                       | 9.2                             |
| <b>Average</b> | 46±12          | F: 58%       | 81±13          | 26±3                        | 14±4                                   | 70±30                                    | 2 (0.7-7)                       |

**Abbreviations:** ACR, albumin to creatinine ratio; BMI, body mass index; eGFR, estimated glomerular filtration rate according to CKD-EPI equation; N.A., not available.

**Table S3.** Antibodies

| Used with         | Antibody         | Type    | Species | Conc.   | Source     | Cat#/clone | Epitope |
|-------------------|------------------|---------|---------|---------|------------|------------|---------|
| <b>NTA</b>        | AQP2 (intracell) | Primary | Rabbit  | 1:1000  | Millipore  | 178612     | 254-271 |
|                   | AQP2 (extracell) | Primary | Rabbit  | 1:1000  | Fenton     | Rb323      | 178-191 |
|                   | Rabbit, alexa488 | Sec.    | Goat    | 1:300   | Thermo SC  | A-11008    | N.A.    |
| <b>EVQuant</b>    | CD9 alexa-647    | Primary | Mouse   | 1:25    | Thermo SC  | MA5-18154  | EC2     |
|                   | CD63 alexa-488   | Primary | Mouse   | 1:80    | Santa Cruz | SC5275     | N.A.    |
|                   | AQP2 ATTO-488    | Primary | Rabbit  | 1:100   | Stressmarq | Spc-503    | 253–262 |
| <b>CD9-TRFIA</b>  | CD9-biotin       | Capture | Mouse   | 1:500   | Thermo SC  | SN4 C3-3A2 | N.A.    |
|                   | CD9-Europium     | Primary | Mouse   | 25ng/mL | CellGS     | CGS12A     | N.A.    |
| <b>IP</b>         | CD9-biotin       | Capture | Mouse   | 1:50    | Thermo SC  | SN4 C3-3A2 | N.A.    |
|                   | CD63-biotin      | Capture | Mouse   | 1:50    | Biologend  | H5C6       | C-term  |
| <b>Immunoblot</b> | CD9              | Primary | Mouse   | 1:500   | R&D Syst   | MAB1880    | 1-228   |
|                   | CD63             | Primary | Mouse   | 1:500   | BD Biosc   | 556019     | N.A.    |
|                   | CD81             | Primary | Mouse   | 1:500   | Novus Biol | MAB4615    | N.A.    |
|                   | ALIX             | Primary | Mouse   | 1:200   | Santa Cruz | SC53540    | N.A.    |
|                   | TSG101           | Primary | Mouse   | 1:333   | Abcam      | ab83       | 167-374 |
|                   | AQP2             | Primary | Rabbit  | 1:1000  | Stressmarq | 9398       | 253–262 |
|                   | NHE3             | Primary | Rabbit  | 1:1000  | Stressmarq | H7644      | 621–640 |
|                   | NaPi-IIa         | Primary | Rabbit  | 1:500   | Abcam      | ab151129   | 15-97   |
|                   | NKCC2            | Primary | Rabbit  | 1:1000  | Stressmarq | Spc-401D   | 33-55   |
|                   | NCC              | Primary | Rabbit  | 1:2000  | Millipore  | AB3553     | N-term  |
|                   | Mouse HRP        | Sec.    | Goat    | 1:3000  | Biorad     | L005680    | N.A.    |
|                   | Rabbit HRP       | Sec.    | Goat    | 1:3000  | Biorad     | L005679    | N.A.    |
|                   | CD9 (1)          | Primary | Mouse   | 1:800   | R&D Syst   | MAB1880    | 1-228   |
|                   | CD63 (1)         | Primary | Mouse   | 1:500   | BD Biosc   | 556019     | N.A.    |
| <b>IHC/IF</b>     | WT-1             | Primary | Mouse   | 3.7mg/L | Cell Marq  | 348M-9     | N.A.    |
|                   | Villin           | Primary | Rabbit  | 1:500   | Abcam      | ab133510   | 650-750 |
|                   | NKCC2            | Primary | Rabbit  | 1:400   | Stressmarq | Spc401D    | 33-55   |
|                   | Parvalbumin      | Primary | Rabbit  | 1:800   | Swant      | PV27       | N.A.    |
|                   | AQP2             | Primary | Rabbit  | 1:4000  | Stressmarq | 9398       | 253-262 |
|                   | CD9 (2)          | Primary | Mouse   | 1:250   | Novusbio   | 5G6        | N.A.    |
|                   | CD63 (2)         | Primary | Mouse   | 1:250   | Novusbio   | MEM-259    | N.A.    |
|                   | CD81             | Primary | Rabbit  | 1:400   | Genetex    | Gtx101766  | Center  |

**Abbreviations:** Conc., concentration; IHC/IF, immunohistochemistry/immunofluorescence; IP, immunoprecipitation; N.A., not available; Sec., secondary.

**Table S4.** Differential ultracentrifugation steps

| Centrifuge characteristics | Step 1                   | Step 2      | Step 3      | Step 4      |
|----------------------------|--------------------------|-------------|-------------|-------------|
| Force, x g                 | 2,000                    | 17,000      | 17,000      | 200,000     |
| Time, min                  | 10                       | 20          | 20          | 120         |
| Temperature, °C            | 4                        | 4           | 4           | 4           |
| Rotor                      | Standard Hettich Rotanta | 45 Ti       | 70.1 Ti     | 45 Ti       |
| Fixed angle vs swing       | Swing                    | Fixed       | Fixed       | Fixed       |
| K factor                   | 25000                    | 1839        | 965.4       | 156.3       |
| Tube                       | Falcon 50mL              | #355655     | #355603     | #355655     |
| Deceleration time          | 90 sec                   | Max (6 min) | Max (6 min) | Max (6 min) |

All tubings and rotors are from Beck Coulter.

**Table S5.** Overview of statistical analyses

| Figure   | Statistical methods                              | Data distribution |
|----------|--------------------------------------------------|-------------------|
| Figure 1 | Pearson correlation coefficient                  | Normal            |
| Figure 2 | Repeated measures ANOVA                          | Normal            |
| Figure 3 | Repeated measures ANOVA                          | Normal            |
| Figure 4 | Paired T-test (A)                                | Normal            |
|          | Repeated measures ANOVA (C-D)                    | Normal            |
|          | Mixed linear model (F-G)                         | Normal            |
| Figure 5 | Pearson correlation coefficient and Bland-Altman | Normal            |
| Figure 8 | ANOVA with post-hoc test (B, E, F)               | Normal            |
|          | Repeated measures ANOVA (G)                      | Normal            |
|          | Paired T-test (H)                                | Normal            |

**Table S6.** Additional characteristics and urine biochemistries of the water loading experiment.

| Variable                                               | T1      | T2      | W1         | W2         | W3       | W4      | ANOVA             |
|--------------------------------------------------------|---------|---------|------------|------------|----------|---------|-------------------|
| <b>Additional characteristics</b>                      |         |         |            |            |          |         |                   |
| Void deviation from schedule (min)                     | 2±4     | 0±1     | -2±4       | -1±4       | 0±1      | 0±2     | 0.09              |
| Process time (min)                                     | 62±7    | 55±7    | 58±6       | 57±7       | 52±10    | 65±7*   | <b>0.001</b>      |
| Time in bladder (hours)                                | 3.06    | 1.97    | 1.96       | 1.02       | 2.02     | 1.99    | -                 |
| Urine volume (mL)                                      | 105±24  | 76±27   | 713±188*** | 354±214*** | 248±130* | 110±35  | <b>&lt;0.0001</b> |
| Urinary flow rate (ml/min)                             | 0.6±0.2 | 0.6±0.2 | 6±2***     | 6±4***     | 2±0.9    | 1.0±0.3 | <b>&lt;0.0001</b> |
| Weight before time point (kg)                          | 85±13   | 85±13   | 87±14***   | 86±14***   | 86±13*   | 85±13   | <b>&lt;0.0001</b> |
| <b>Urine biochemistries</b>                            |         |         |            |            |          |         |                   |
| Na <sup>+</sup> (μmol/min)                             | 67±37   | 83±62   | 113±67     | 110±46     | 98±31    | 81±24   | <b>0.03</b>       |
| K <sup>+</sup> (μmol/min)                              | 60±21   | 85±28   | 103±41     | 123±73**   | 78±32    | 56±14   | <b>0.0005</b>     |
| Cl <sup>-</sup> (μmol/min)                             | 88±34   | 113±41  | 113±38     | 115±36     | 96±23    | 82±19   | <b>0.01</b>       |
| H <sub>2</sub> PO <sub>4</sub> <sup>-</sup> (μmol/min) | 11±5    | 10±3    | 15±4       | 13±6       | 21±8***  | 26±8*** | <b>&lt;0.0001</b> |
| Urea (μmol/min)                                        | 218±70  | 214±55  | 349±87***  | 335±88***  | 304±84** | 247±56  | <b>&lt;0.0001</b> |

\*  $P < 0.05$ , \*\*  $P < 0.01$ , \*\*\*  $P < 0.001$  vs. T2.

**Figure S1.** Schematic overview of water loading test

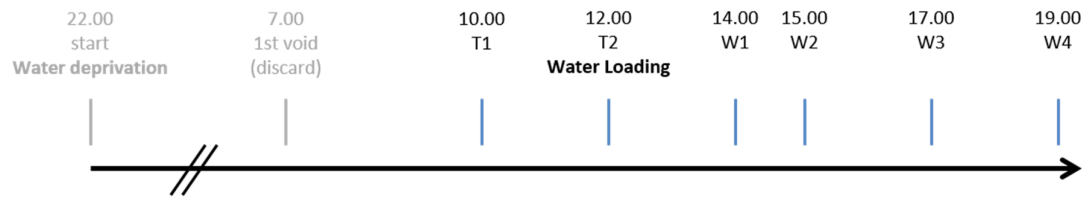

Schematic overview of the time points in the water loading test in healthy subjects. Water deprivation started at 10 p.m. the day before the test. The first urine void at 7.00 a.m. was discarded. T1-2 (urine voids at 10.00 a.m. and noon, respectively) are samples obtained during the water deprivation period, while W1-4 (urine voids at 2.00, 3.00, 5.00, and 7.00 p.m.) are samples obtained after water loading. Participants did not urinate between these time points. Water loading consisted of 20 mL/kg water within 30 minutes at noon, and was combined with a standardized meal.

**Figure S2.** Particle yield of differential ultracentrifugation

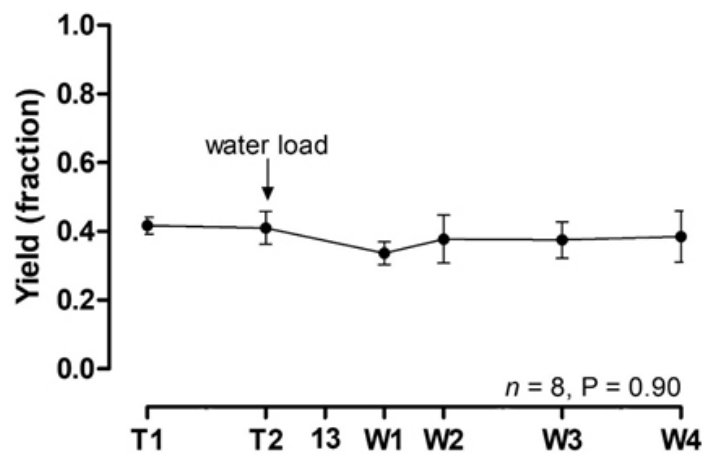

**Legend:** To establish the yield, the 200K pellet was re-dissolved in the original volume. EVQuant was used to count the number of particles prior to and after ultracentrifugation. The yield is expressed as the fraction of the particles present after ultracentrifugation compared to the number of particles present before ultracentrifugation.

**Figure S3:** Effect of centrifugation on particle size.

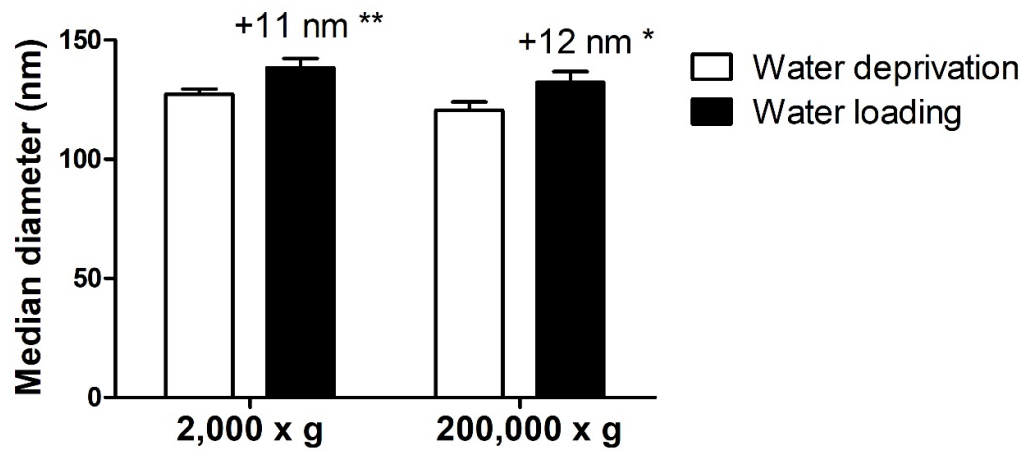

**Legend:** Particle size was measured using NTA in 6 water deprivation and 6 water loading samples in whole urine or in the 200,000 x g pellet. The difference in particle size between water loading and water deprivation was +11 nm after 2,000 x g centrifugation (\*\*  $P < 0.01$ ) and +12 nm after 200,000 x g centrifugation (\*  $P < 0.05$ ). After ultracentrifugation, particles were on average 6 nm smaller ( $P = 0.04$ ).

**Figure S4.** Correlation CD9+ particles with urine creatinine

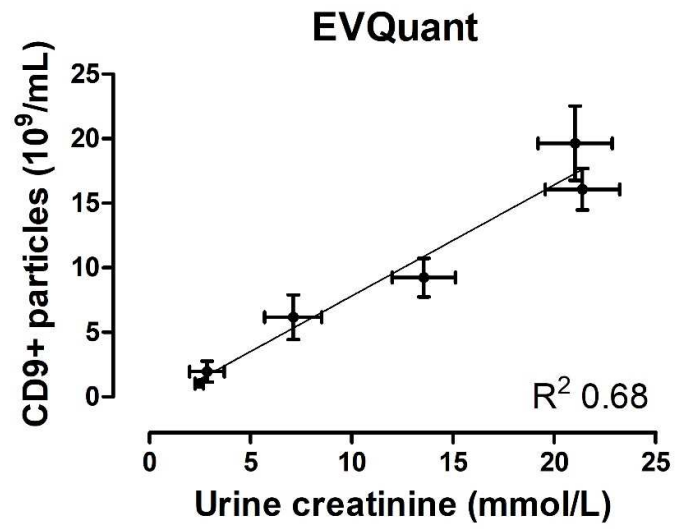

**Legend:** Analyzed in urine samples collected from 8 participants in the water loading study.

**Figure S5.** Urine characteristics and particle concentrations after water loading and with time-control

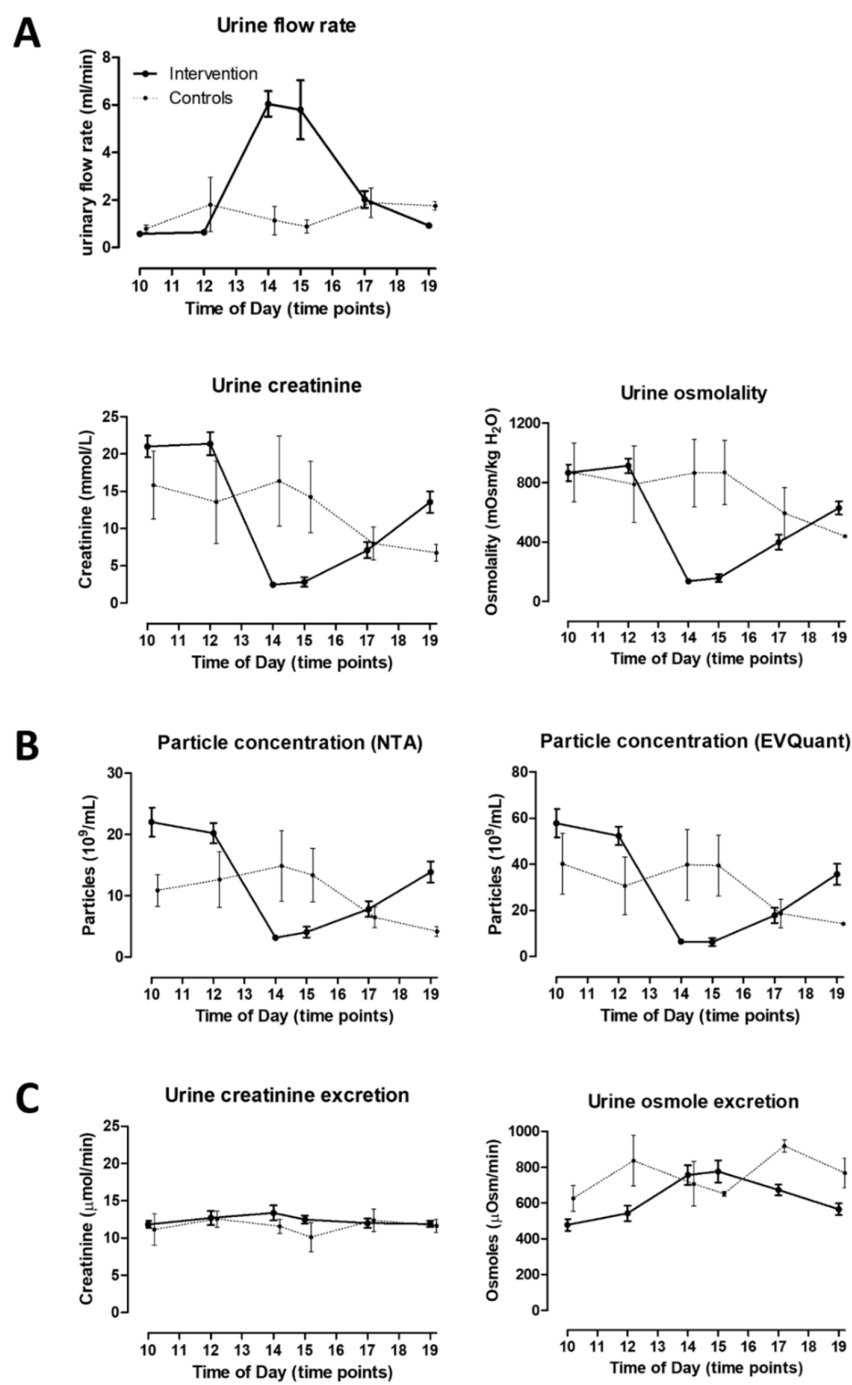

**Figure S6.** Particle size distribution per time point in the water loading study

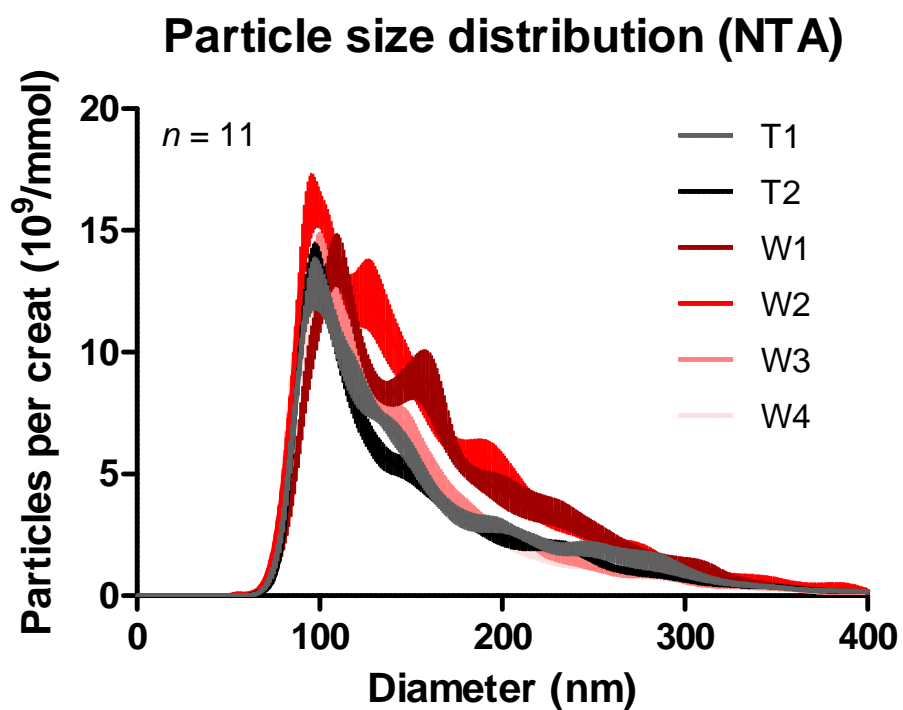

**Legend:** Particle size distribution by NTA of each of the time points of the water loading, of combined version is shown in Figure 3B.

**Figure S7.** Representative raw image data of NTA (A), EVQuant (B), CD9-TR-FIA (C)

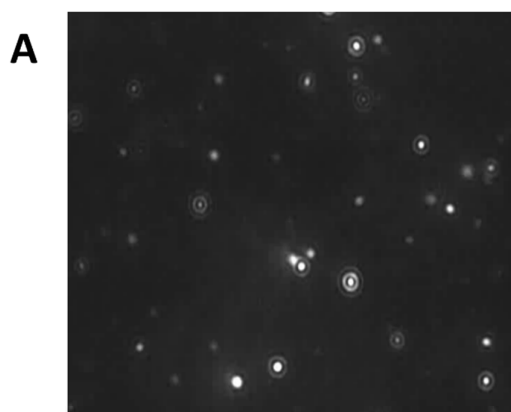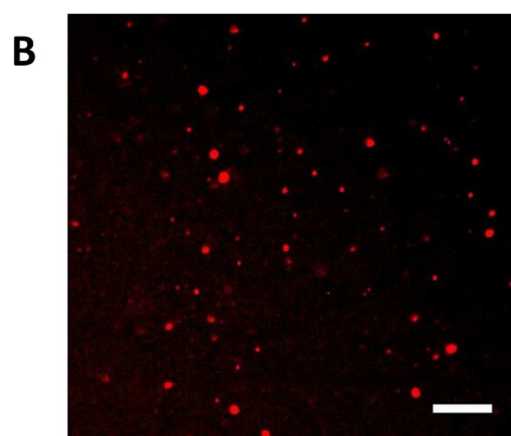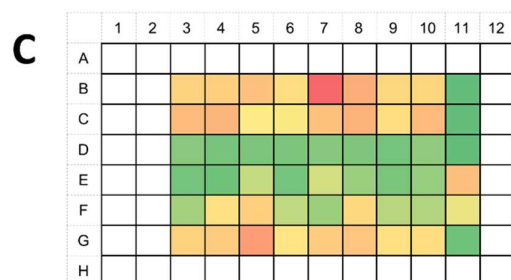

**Figure S8.** Additional immunoblots of CD9 and CD63 precipitations.

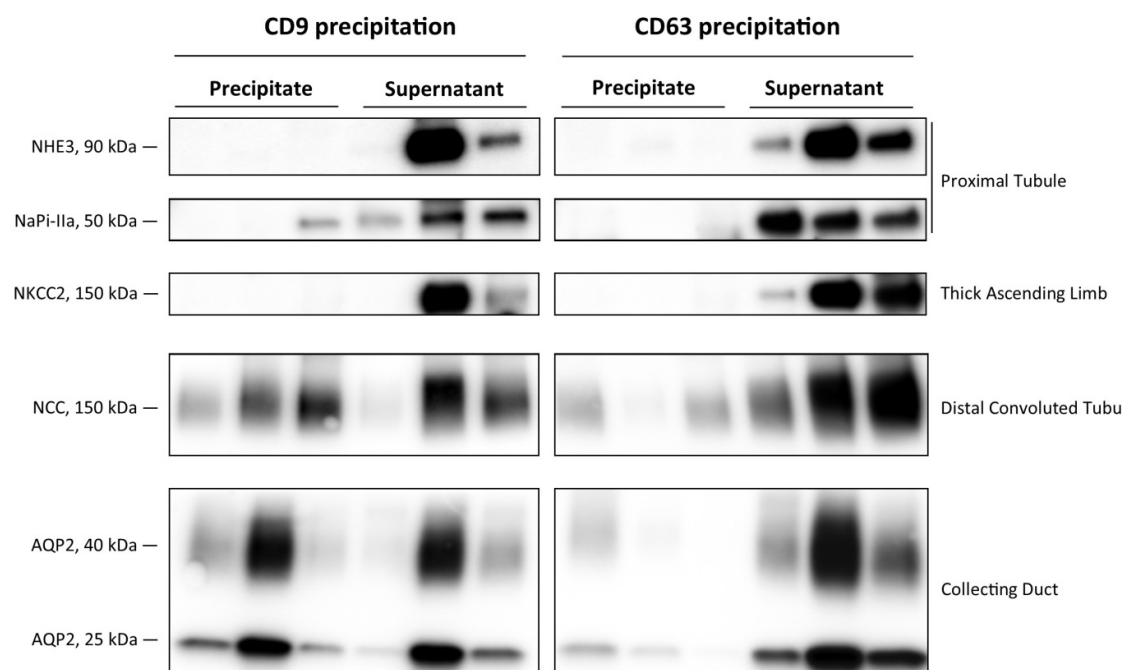

**Legend:** Characterization of CD9<sup>+</sup> and CD63<sup>+</sup> uEVs of Patients 4 – 6 (supplement to **Figure 7** which shows Patients 1 – 3). Immunoblot comparison of uEVs precipitated from 200K urine pellets by CD9- or CD63-antibody coated magnetic beads, and respective supernatant, with the nephron-segment markers NHE3, NKCC2, NCC, and AQP2.

**Figure S9:** Co-localization studies for a second CD9 and CD63 antibody, and for CD81.

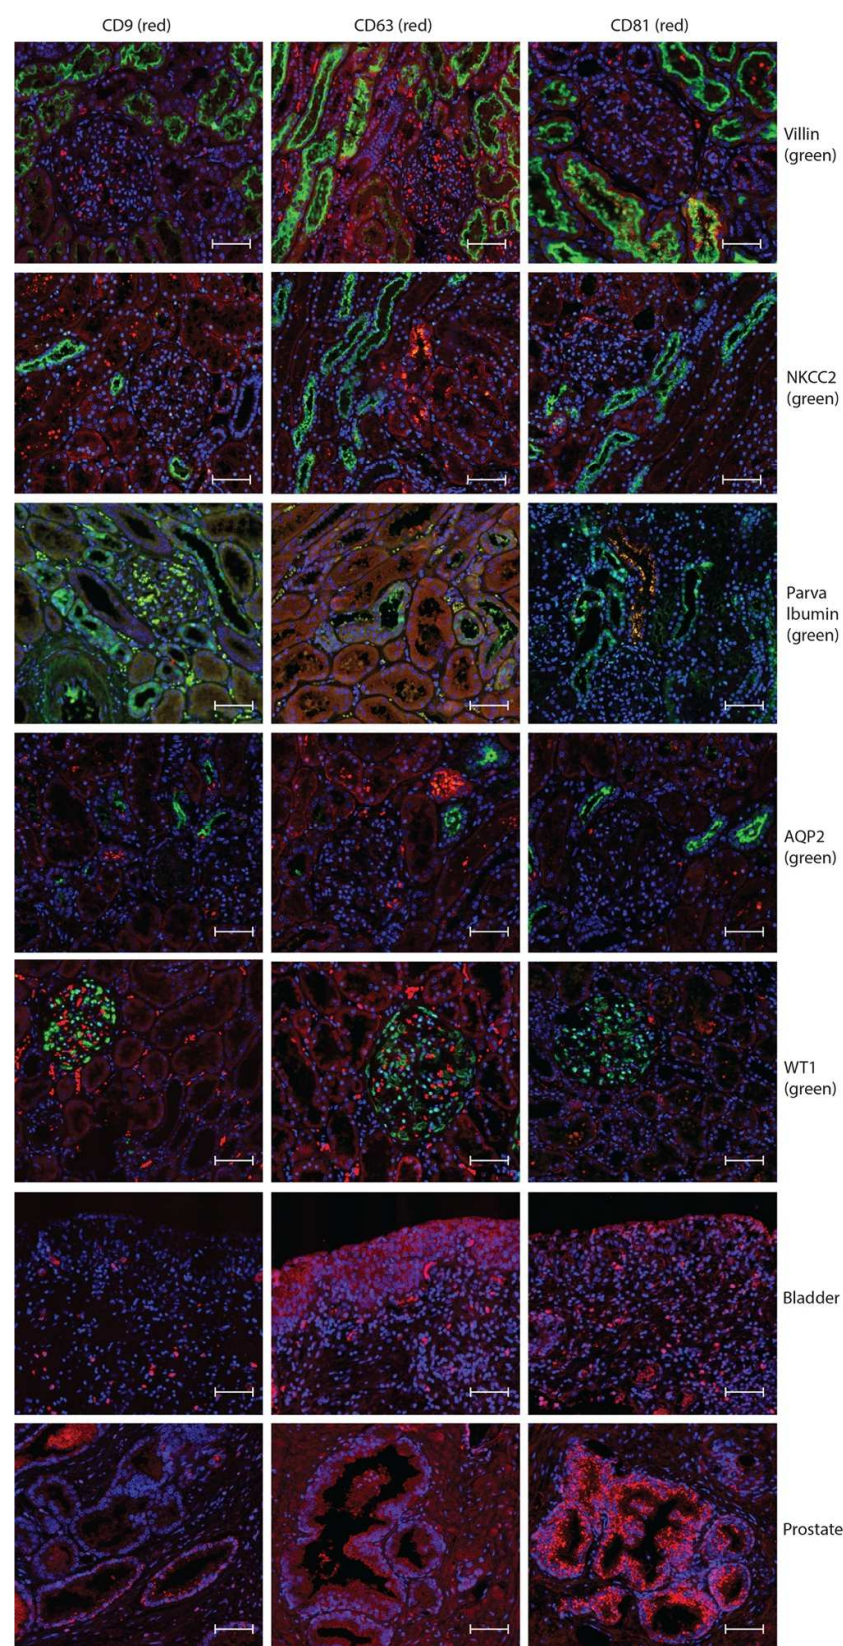

**Figure S10:** Additional NTA data

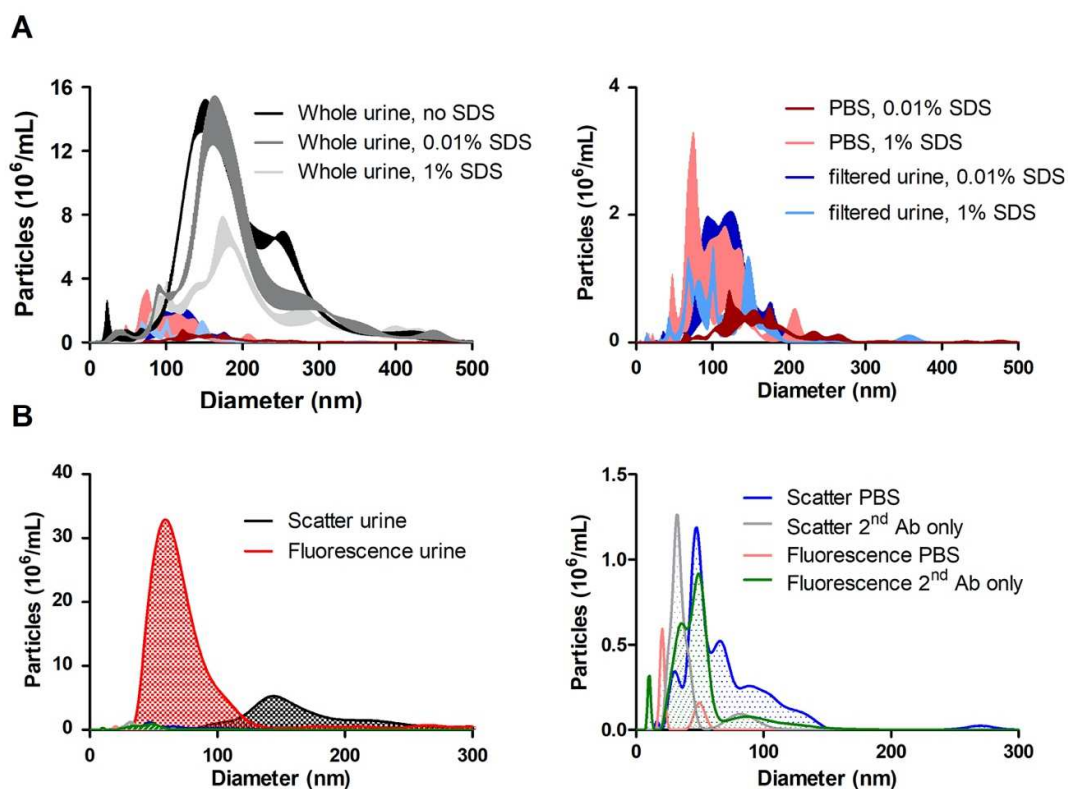

**Legend:** Additional controls to the data shown in Figure 8A and D.

**(A)** Left: Figure 8A with the addition of PBS or filtered urine (no uEVs) with 0.01% or 1% SDS. Right:

close-up of the additional controls only.

**(B)** Left: Figure 8D with the addition of PBS only and 2<sup>nd</sup> antibody only in either scatter or

fluorescence mode. Right: close-up of the additional controls only.

**Figure S11:** Characteristics of the extracellular-epitope AQP2 antibody

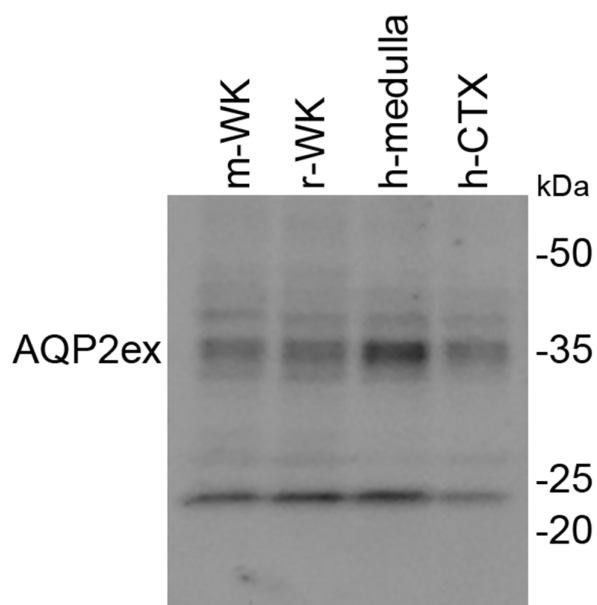

**Legend:** Immunoblotting of 10  $\mu$ g protein homogenates from mouse whole kidney (m-WK), rat whole kidney (r-WK), human kidney medulla (h-medulla) or human cortex (h-CTX). Signals representing the glycosylated (~35 kDa) and non-glycosylated (~22 kDa) forms of AQP2 were observed in all samples.

**Extracellular AQP2 antibody production:** A 15-amino acid peptide, CYFTGCSMNPARSLAP (the NH<sub>2</sub> terminal cysteine added for conjugation) corresponding to amino acids 177-191 of mouse AQP2 accession #AAB71414.1 (94% identity to human) was produced by standard solid phase techniques and conjugated to keyhole limpet hemocyanin (KLH) via covalent linkage to the NH<sub>2</sub>-terminal cysteine (Genscript USA). The antibody was affinity purified from terminal bleed serum using the immunizing peptide as described previously. The antibody titer was determined to be >1:512,000 using ELISA and AQP2 peptide conjugated plates. Antibody specificity was determined by: a) western blotting of human whole kidney, cortex or medulla tissue, showing a strong band of the characteristic molecular mass of AQP2 (Figure above); b) immunohistochemical labeling of mouse and human kidney showing characteristic labeling of tubules morphologically similar to collecting ducts (not shown).

**Videos S1 and S2:** Representative NTA videos before and after the addition of THP.

***See separately uploaded videos.***

**Legend:** When visually inspecting the NTA recordings for samples before and after THP addition, the increased small particle numbers appear to also include non-spherical objects. While NTA is not a platform intended to assess the shape or structural properties of particles, visual inspection is compatible with THP-vesicle or THP-protein aggregate formation, as could be expected due to THP multimer formation.
